# Supplementary material for: QiShenYiQi Pills Attenuates Ischemia/Reperfusion-Induced Cardiac Microvascular Hyperpermeability Implicating Src/Caveolin-1 and RhoA/ROCK/MLC Signaling
Source: Front Physiol. 2021 Dec 17;12:753761. doi: 10.3389/fphys.2021.753761 (PMC8718710; doi:10.3389/fphys.2021.753761)
Supplement: Supplementary file 3 [file Data_Sheet_1.xlsx]

## Sheet: Sheet1
Fig1 C
Fluorescence intensity (Ip/Iv)	NS+Sham	QSYQ+Sham	NS+H/R	QSYQ+H/R
	0.801678	1.41789	4.2189	2.38978
	1.54978	0.765862	3.86904	2.18974
	0.801276	0.998738	5.23988	1.79863
	0.498721	1.02349	4.17653	2.47637
	0.897628	1.23897	3.45698	2.52789
	1.40282	0.821673	4.86789	1.87924
Fig 2B
cell viability (OD450)	NS+Sham	QSYQ+Sham	NS+H/R	QSYQ 0.05 +H/R	QSYQ 0.1 +H/R	QSYQ 0.5 +H/R	QSYQ 1 +H/R	QSYQ 2+H/R
	1.138	1.048	0.585	1.074	1.024	0.803	0.842	0.678
	1.292	1.182	0.699	1.066	0.984	0.958	0.963	0.818
	1.343	1.037	0.586	0.991	1.096	1.045	1.102	0.871
	1.234	1.15	0.559	1.119	1.061	1.055	0.991	0.895
	1.198	1.144	0.663	1.107	1.104	1.078	0.848	0.845
	1.192	1.165	0.669	1.113	1.021	1.001	0.973	0.823
	0.983	1.117	0.627	1.058	1.011	0.972	0.991	0.879
	1.147	1.145	0.518	1.04	1.085	1.21	0.882	0.863
	1.087	1.029	0.715	1.004	1.01	0.816	0.752	0.925
Fig 2C
Fluorescence intensity	NS+Sham	QSYQ+Sham	NS+H/R	QSYQ+H/R
	3003	4019	16491	8997
	2261	3219	18053	8316
	2946	2190	14042	8696
	3459	2415	15025	6438
	2571	2983	14044	7429
	3253	3518	17953	6592
Fig 3B
p-Src/GAPDH	NS+Sham	QSYQ+Sham	NS+H/R	QSYQ+H/R
	0.642	0.662	1.232	0.655
	0.911	0.899	1.412	0.971
	0.762	0.782	1.022	0.781
p-caveolin-1/GAPDH	NS+Sham	QSYQ+Sham	NS+H/R	QSYQ+H/R
	0.782	0.801	1.065	0.871
	0.893	0.887	1.325	0.921
	0.901	0.867	1.238	0.899
caveolin-1/GAPDH	NS+Sham	QSYQ+Sham	NS+H/R	QSYQ+H/R
	1.021	0.982	1.552	1.103
	0.752	0.723	1.299	0.729
	1.111	1.109	1.521	0.978
Fig 3E
Claudin-5/GAPDH	NS+Sham	QSYQ+Sham	NS+H/R	QSYQ+H/R
	0.902	1.023	0.538	0.829
	0.734	0.689	0.358	0.721
	0.687	0.621	0.427	0.902
VE-cadherin/GAPDH	NS+Sham	QSYQ+Sham	NS+H/R	QSYQ+H/R
	0.873	0.902	0.639	0.926
	1.032	0.989	0.556	0.979
	0.891	0.799	0.727	0.777
occludin/GAPDH	NS+Sham	QSYQ+Sham	NS+H/R	QSYQ+H/R
	1.013	1.198	0.529	0.928
	0.927	0.902	0.408	1.021
	0.892	0.922	0.421	0.689
ZO-1/GAPDH	NS+Sham	QSYQ+Sham	NS+H/R	QSYQ+H/R
	1.028	1.132	0.639	1.092
	1.442	1.212	0.783	0.903
	1.178	0.892	0.587	0.893
Fig 4B
ATP content (nM/g protein)	NS+Sham	QSYQ+Sham	NS+H/R	QSYQ+H/R
	1527.01	1434.74	1049.95	1166.41
	1591.93	1312.53	1046.71	1179.54
	1354.31	1265.32	1032.1	1228.85
	1327.37	1313.42	1003.27	1288.33
	1295.58	1488.76	1160.02	1353.27
	1453.29	1481.93	1143.87	1346.61
	1399.46	1445.74	983.229	1177.25
	1348.1	1510.31	1034.49	1332.43
	1419.1	1355.54	1083.35	1370.73
	1374.58	1327.59	902.173	1361.11
AMP content (nM/g protein)	NS+Sham	QSYQ+Sham	NS+H/R	QSYQ+H/R
	55.5762	60.3896	76.8063	58.7822
	57.7128	59.3171	74.3507	60.7459
	54.3153	65.1544	68.4387	66.279
	56.3696	65.3098	67.1818	65.6148
	60.0515	58.2267	66.7939	63.8243
	59.4557	59.6638	65.1604	65.7431
	62.5795	58.4981	64.9272	62.2479
	61.6121	58.7912	64.603	60.892
	57.8326	54.6671	65.9093	64.9259
	57.6738	57.2121	65.1673	59.3041
ATP/AMP ratio	NS+Sham	QSYQ+Sham	NS+H/R	QSYQ+H/R
	27.476	23.758	13.6701	19.8428
	27.5837	22.1274	14.078	19.4176
	24.9341	19.4203	15.0806	18.5406
	23.5476	20.1106	14.9336	19.6347
	21.5746	25.5683	17.3671	21.203
	24.4432	24.8381	17.5547	20.4829
	22.363	24.7143	15.1436	18.9123
	21.8805	25.6893	16.013	21.8819
	24.5381	24.7963	16.437	21.1122
	23.8337	23.2047	13.844	22.9513
Fig 4C
complex I activity (mOD/min)	NS+Sham	QSYQ+Sham	NS+H/R	QSYQ+H/R
	2.521	2.554	1.452	1.898
	2.334	2.037	1.327	1.658
	2.019	1.769	1.023	1.557
	1.923	2.234	1.156	1.459
	2.432	1.693	1.263	1.834
	1.928	2.032	1.321	1.774
Fig 4D
YME1L1/GAPDH	NS+Sham	QSYQ+Sham	NS+H/R	QSYQ+H/R
	0.982	0.873	0.542	0.894
	0.826	0.932	0.629	0.985
	1.121	1.076	0.752	1.019
NDUFA12/GAPDH	NS+Sham	QSYQ+Sham	NS+H/R	QSYQ+H/R
	1.128	1.228	0.572	0.992
	1.453	1.548	0.762	1.364
	1.569	1.436	0.872	1.319
Fig 4E
YME1L1 activity (U/g protein)	NS+Sham	QSYQ+Sham	NS+H/R	QSYQ+H/R
	41.4243	43.5481	37.2694	39.4997
	40.3288	43.231	36.9663	40.1473
	48.6826	40.2484	36.6981	41.3713
	48.4931	40.0682	37.3439	40.5756
	45.1157	40.112	35.0943	46.15
	44.9049	40.0569	34.9391	45.5235
	41.3317	41.8297	34.8642	40.8253
	42.7357	42.4118	36.475	42.5355
	46.4646	47.9327	39.8459	41.8693
	45.7286	46.8578	38.8589	40.8909
Fig 5A
ATP synthase activity (mOD/min)	NS+Sham	QSYQ+Sham	NS+H/R	QSYQ+H/R
	1.657	1.465	0.466	0.894
	1.832	1.737	0.527	0.562
	1.335	1.535	0.682	0.597
	1.267	1.129	0.352	0.993
	1.235	1.212	0.326	0.873
	1.368	1.256	0.369	0.758
Fig 5C
ATP5D/GAPDH	NS+Sham	QSYQ+Sham	NS+H/R	QSYQ+H/R
	0.786	0.867	0.529	0.834
	0.673	0.783	0.387	0.647
	0.882	0.932	0.519	0.712
RhoA/GAPDH	NS+Sham	QSYQ+Sham	NS+H/R	QSYQ+H/R
	0.529	0.621	1.229	0.652
	0.723	0.809	1.023	0.789
	0.829	0.729	1.021	0.726
ROCK/GAPDH	NS+Sham	QSYQ+Sham	NS+H/R	QSYQ+H/R
	0.434	0.494	0.928	0.598
	0.539	0.502	0.873	0.682
	0.639	0.602	0.992	0.783
p-MLC/GAPDH	NS+Sham	QSYQ+Sham	NS+H/R	QSYQ+H/R
	0.908	0.873	1.242	0.832
	0.871	0.823	1.17	0.982
	0.654	0.639	1.097	0.739
Fig 6D
MMP2/GAPDH	NS+Sham	QSYQ+Sham	NS+H/R	QSYQ+H/R
	0.598	0.825	1.109	0.868
	0.887	0.718	1.021	0.684
	0.735	0.649	1.261	0.737
MMP9/GAPDH	NS+Sham	QSYQ+Sham	NS+H/R	QSYQ+H/R
	0.439	0.435	1.015	0.615
	0.447	0.538	1.207	0.526
	0.785	0.737	0.899	0.731
CTSS/GAPDH	NS+Sham	QSYQ+Sham	NS+H/R	QSYQ+H/R
	0.629	0.651	1.098	0.792
	0.548	0.785	1.274	0.679
	0.724	0.712	1.032	0.823
Fig 6E
MMP2 activity (U/g protein)	NS+Sham	QSYQ+Sham	NS+H/R	QSYQ+H/R
	1105.83	1100.12	1576.62	1118.75
	1194.46	1100.12	1655.65	1127.16
	1190.26	1023.67	1454.95	1119
	1199.96	1081.98	1566.28	1127.9
	1021.47	1004.1	1409.07	1252.88
	1033.01	1001.3	1348.48	1261.27
	995.703	1067.25	1492.81	1166.25
	997.544	1105.45	1374.86	1139.62
	993.796	1189.93	1564.64	1219.91
	1006.02	1159.64	1426.33	1168.31
MMP9 activity (U/g protein)	NS+Sham	QSYQ+Sham	NS+H/R	QSYQ+H/R
	9.02515	8.131	9.53496	7.98148
	9.06404	8.28436	9.5552	8.02303
	7.79529	8.76971	9.68902	8.04401
	7.93338	8.85401	9.40414	7.94829
	7.06124	7.71437	8.94215	8.40508
	7.26187	7.6332	9.17297	8.32467
	7.1264	7.4601	8.5721	8.91195
	7.34959	7.74692	8.53621	8.72677
	7.79277	7.29163	8.89971	8.64706
	7.83077	7.64855	8.9204	8.68472
CTSS activity (U/g protein)	NS+Sham	QSYQ+Sham	NS+H/R	QSYQ+H/R
	35.0363	31.5641	42.6056	35.8967
	34.7914	32.6909	43.2567	35.1278
	35.8537	36.2021	40.2799	35.8976
	33.6413	35.9366	39.5266	35.6334
	33.1443	34.0523	38.3559	37.9431
	35.8506	33.5706	36.668	36.4521
	29.9999	32.7271	42.8849	31.8128
	31.1712	33.0669	43.0161	30.1878
	32.6398	33.5504	38.4682	35.9284
	32.7195	34.3303	38.6908	35.1466
Fig 7B
p-caveolin-1/GAPDH	NS+Sham	QSYQ+Sham	NS+H/R	QSYQ+H/R	PP2+H/R
	0.801	0.782	1.265	0.871	0.763
	0.917	0.893	1.325	0.921	0.893
	0.927	0.901	1.238	0.899	0.789
Claudin-5/GAPDH	NS+Sham	QSYQ+Sham	NS+H/R	QSYQ+H/R	PP2+H/R
	0.902	1.023	0.358	0.829	0.738
	0.934	0.919	0.538	0.721	0.672
	1.187	1.221	0.427	0.902	0.911
Fig 7C
MMP9 activity (U/g protein)	NS+Sham	QSYQ+Sham	NS+H/R	QSYQ+H/R	PP2+H/R
	9.02515	8.131	9.53496	7.98148	7.82999
	9.06404	8.28436	9.5552	8.02303	7.78901
	7.79529	8.76971	9.68902	8.04401	8.21528
	7.93338	8.85401	9.40414	7.94829	8.3896
	7.06124	7.71437	8.94215	8.40508	8.55055
	7.26187	7.6332	9.17297	8.32467	8.5133
	7.1264	7.4601	8.5721	8.91195	9.19016
	7.34959	7.74692	8.53621	8.72677	9.05783
	7.79277	7.29163	8.89971	8.64706	8.20794
	7.83077	7.64855	8.9204	8.68472	8.45347
CTSS activity (U/g protein)	NS+Sham	QSYQ+Sham	NS+H/R	QSYQ+H/R	PP2+H/R
	35.0363	31.5641	42.6056	35.8967	40.6179
	34.7914	32.6909	43.2567	35.1278	39.2415
	35.8537	36.2021	40.2799	35.8976	32.2979
	33.6413	35.9366	39.5266	35.6334	31.8913
	33.1443	34.0523	38.3559	37.9431	35.1972
	35.8506	33.5706	36.668	36.4521	34.3371
	29.9999	32.7271	42.8849	31.8128	34.856
	31.1712	33.0669	43.0161	30.1878	33.9036
	32.6398	33.5504	38.4682	35.9284	34.0333
	32.7195	34.3303	38.6908	35.1466	37.1631
Fig 7D
Fluorescence intensity	NS+Sham	QSYQ+Sham	NS+H/R	QSYQ+H/R	PP2+H/R
	3003	4019	16491	8997	13597
	2261	3219	18053	8316	11512
	2946	2190	14042	8696	12965
	3459	2415	15025	6438	11413
	2571	2983	14044	7429	10298
	3253	3518	17953	6592	10549
